# Supplementary material for: Nutritional Composition, In Vitro Antioxidant Activity and Phenolic Profile of Shortcrust Cookies Supplemented by Edible Flowers
Source: MDPI journal article supplement (doi:10.3390/foods10112531), 2021-10-21
Supplement: s1 [file s1]

## **Supplementary material**

# **Nutritional Composition, In Vitro Antioxidant Activity and Phenolic Profile of Shortcrust Cookies Supplemented by Edible Flowers**

Kristýna Šťastná <sup>1</sup>, Daniela Sumczynski <sup>1,\*</sup>, Erkan Yalcin <sup>2</sup>

<sup>1</sup> Faculty of Technology, Department of Food Analysis and Chemistry, Tomas Bata  
University in Zlín, Náměstí T.G. Masaryka 5555, 760 01 Zlín, Czech Republic

<sup>2</sup> Faculty of Engineering, Gölköy Campus, Bolu Abant İzzet Baysal University,  
Bolu 14030, Turkey

\* Correspondence: sumczynski@utb.cz

**Table S1.** The correlation coefficients of chemical properties with in vitro digestibility values.

| <i>r</i> <sup>a</sup> | CP     | CFat   | Ash    | TCH    | Starch | CF     | NDF    |
|-----------------------|--------|--------|--------|--------|--------|--------|--------|
| DMD                   | 0.1849 | 0.1967 | 0.9042 | 0,2534 | 0.8978 | 0.9530 | 0.9132 |
| OMD                   | 0.1924 | 0.2232 | 0.9189 | 0,2780 | 0.8795 | 0.9462 | 0.9040 |

<sup>a</sup>Pearson's correlation coefficient.

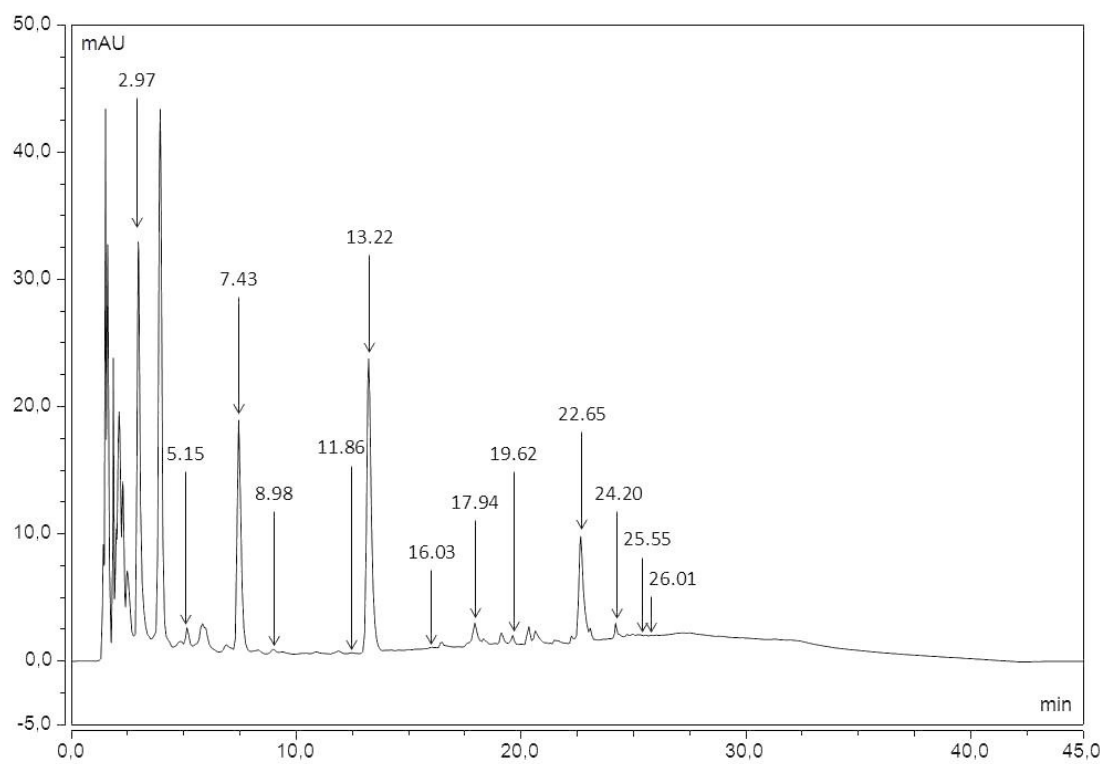

**Figure S1.** HPLC chromatogram for analysis of free phenolics in control sample; detected at the wavelength of 275 nm.

2.97 – gallic acid; 5.15 – protocatechuic acid; 7.43 – neochlorogenic acid; 8.98 – 4-hydroxybenzoic acid; 11.86 – catechin; 13.22 – vanillic acid; 16.03 – syringic acid; 17.94 – epicatechin; 19.62 – *trans-p*-coumaric acid; 22.65 – ferulic acid; 24.20 – protocatechuic acid ethylester; 25.55 – rutin; 26.01 – *trans*-cinnamic acid.

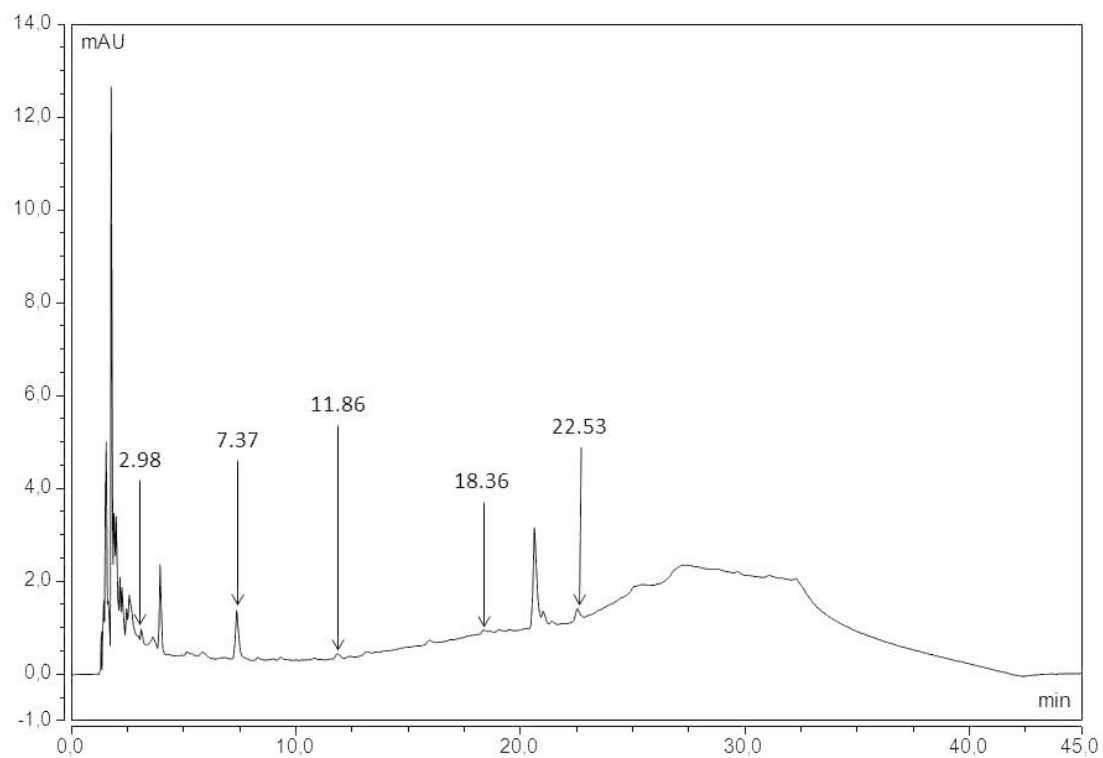

**Figure S2.** HPLC chromatogram for analysis of bound phenolics in control sample; detected at the wavelength of 275 nm.

2.98 – gallic acid; 7.37 – neochlorogenic acid; 11.86 – catechin; 18.36 – epicatechin; 22.53 – ferulic acid.

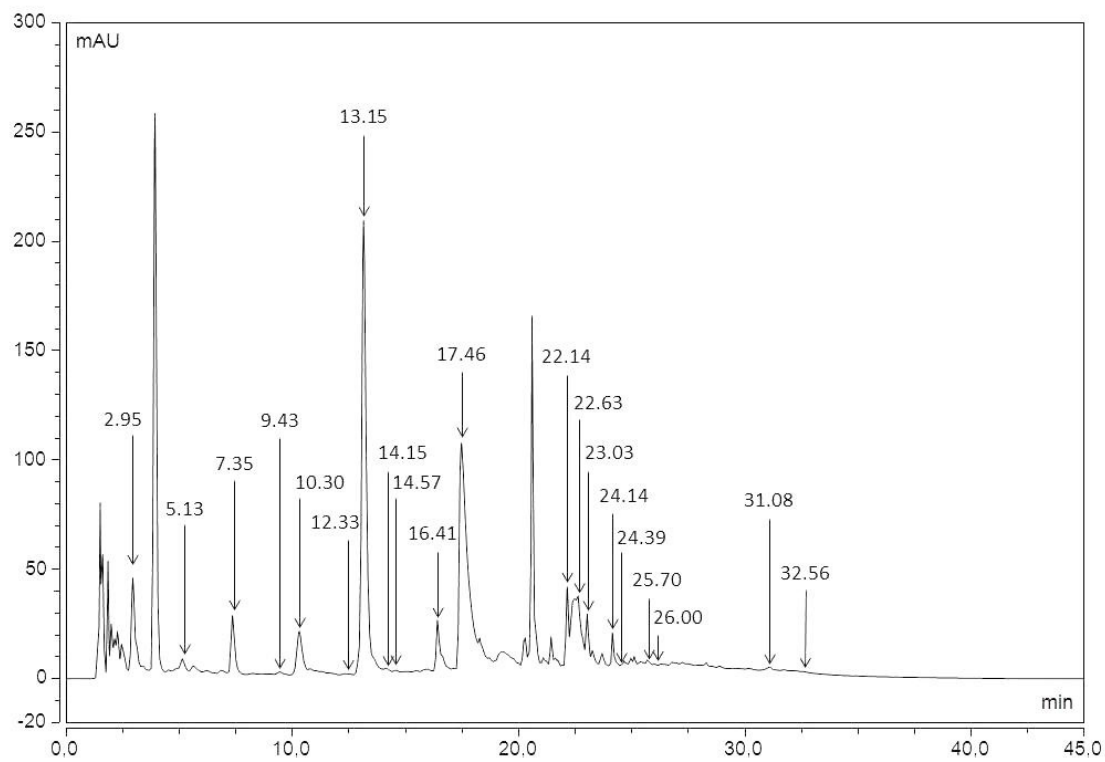

**Figure S3.** HPLC chromatogram for analysis of free phenolics in kamut sample; detected at the wavelength of 275 nm.

2.95 – gallic acid; 5.13 – protocatechuic acid; 7.35 – neochlorogenic acid; 9.43 – 4-hydroxybenzoic acid; 10.30 – epigallocatechin; 12.33 – catechin; 13.15 – vanillic acid; 14.15 – chlorogenic acid; 14.57 – caffeic acid; 16.41 – syringic acid; 17.46 – epicatechin; 22.14 – sinapic acid; 22.63 – ferulic acid; 23.03 – ellagic acid; 24.14 – protocatechuic acid ethylester; 24.39 – *trans*-2-hydroxycinnamic acid; 25.70 – rutin; 26.00 – *trans*-cinnamic acid; 31.08 – resveratrol; 32.56 – kaempferol.

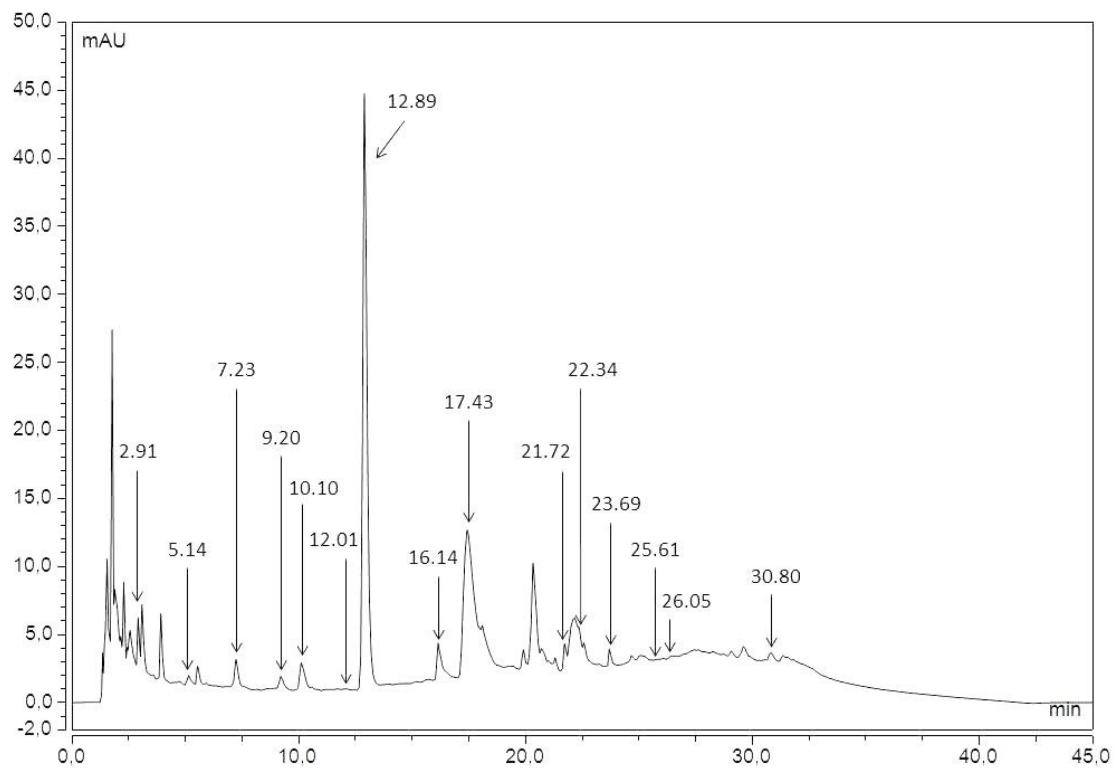

**Figure S4.** HPLC chromatogram for analysis of bound phenolics in kamut sample; detected at the wavelength of 275 nm.

2.91 – gallic acid; 5.14 – protocatechuic acid; 7.23 – neochlorogenic acid; 9.20 – 4-hydroxybenzoic acid; 10.10 – epigallocatechin; 12.01 – catechin; 12.89 – vanillic acid; 16.14 – syringic acid; 17.43 – epicatechin; 21.72 – sinapic acid; 22.34 – ferulic acid; 23.69 – protocatechuic acid ethylester; 25.61 – rutin; 26.05 – *trans*-cinnamic acid; 30.80 – resveratrol.
